# Supplementary material for: The therapeutic potential of losartan in lung metastasis of colorectal cancer
Source: PubMed Central journal article supplement (PMC7355150; doi:10.17179/excli2020-2093), 2020-06-29
Supplement: EXCLI-19-927-s-001.pdf [file EXCLI-19-927-s-001.pdf]

**Supplementary data to:**

**THE THERAPEUTIC POTENTIAL OF LOSARTAN IN LUNG  
METASTASIS OF COLORECTAL CANCER**

Milad Hashemzahi<sup>1,2\*</sup>, Niloufar Naghibzadeh<sup>2\*</sup>, Fereshteh Asgharzadeh<sup>1,2\*</sup>, Asma Mostafapour<sup>3</sup>, Seyed Mahdi Hassanian<sup>3</sup>, Gordon A. Ferns<sup>5</sup>, William C. Cho<sup>6</sup>, Amir Avan<sup>2,3,4,#</sup>, Majid Khazaei<sup>2,3,#</sup>

- <sup>1</sup> Department of Medical Physiology, Faculty of Medicine, Mashhad University of Medical Sciences, Mashhad, Iran
- <sup>2</sup> Student Research Committee, Faculty of Medicine, Mashhad University of Medical Sciences, Mashhad, Iran
- <sup>3</sup> Metabolic Syndrome Research Center, Mashhad University of Medical Sciences, Mashhad, Iran
- <sup>4</sup> Department of Medical Genetics and Molecular Medicine, Faculty of Medicine, Mashhad University of Medical Sciences, Mashhad, Iran
- <sup>5</sup> Brighton & Sussex Medical School, Division of Medical Education, Falmer, Brighton, Sussex BN1 9PH, UK
- <sup>6</sup> Department of Clinical Oncology, Queen Elizabeth Hospital, Kowloon, Hong Kong, China

\* These authors contributed equally as first author.

# **Corresponding authors:** Majid Khazaei, MD, Ph.D., and Amir Avan, Ph.D. Metabolic Syndrome Research Center, Mashhad University of Medical Sciences, Mashhad, Iran; Tel: +98 513 8002298; E-mail: [Khazaeim@mums.ac.ir](mailto:Khazaeim@mums.ac.ir); [avana@mums.ac.ir](mailto:avana@mums.ac.ir);

<http://dx.doi.org/10.17179/excli2020-2093>

This is an Open Access article distributed under the terms of the Creative Commons Attribution License (<http://creativecommons.org/licenses/by/4.0/>).

**Supplementary Table 1:** Body weight, Lung weight, and Lung to body weight ratio in treatment groups

| Group                  | Body weight (g) | Lung weight (g) | Lung to body weight ratio |
|------------------------|-----------------|-----------------|---------------------------|
| Control, Mouse 1       | 15.53           | 0.18            | 0.01159047005795235       |
| Control, Mouse 2       | 16.22           | 0.19            | 0.011713933415536375      |
| Control, Mouse 3       | 16.33           | 0.17            | 0.01041028781383956       |
| Control, Mouse 4       | 26.81           | 0.21            | 0.007832898172323759      |
| Control, Mouse 5       | 25.22           | 0.25            | 0.009912767644726409      |
| 5-FU, Mouse 1          | 17.33           | 0.13            | 0.007501442585112522      |
| 5-FU, Mouse 2          | 19.0            | 0.17            | 0.008947368421052633      |
| 5-FU, Mouse 3          | 14.35           | 0.13            | 0.009059233449477353      |
| Losartan, Mouse 1      | 29.3            | 0.14            | 0.00506168933881683       |
| Losartan, Mouse 2      | 26.12           | 0.12            | 0.006846556584776481      |
| Losartan, Mouse 3      | 28.6            | 0.16            | 0.005361930294906167      |
| Losartan, Mouse 4      | 28.39           | 0.16            | 0.004750593824228029      |
| Losartan+5-FU, Mouse 1 | 31.61           | 0.16            | 0.004778156996587031      |
| Losartan+5-FU, Mouse 2 | 24.83           | 0.17            | 0.004594180704441041      |
| Losartan+5-FU, Mouse 3 | 26.11           | 0.14            | 0.005594405594405594      |
| Losartan+5-FU, Mouse 4 | 29.47           | 0.14            | 0.005635787249031349      |

5-FU, Fluorouracil; Conc, concentration; g, gram of tissue; Four experimental groups comprised: a group untreated with either 5-FU or losartan; a 5-FU group that received 5 mg/kg/every other day, administered intraperitoneally (ip); a losartan group received 90 mg/kg/day; ip; a combination group that received 5-FU (5 mg/kg/every other day; ip) plus (losartan 90 mg/kg/day; ip). [Raw data to Figure 1, main document]

**Supplementary Table 2:** Number of lung metastatic in treatment groups

| Group                  | Number of lung metastatic |
|------------------------|---------------------------|
| Control, Mouse 1       | 23.0                      |
| Control, Mouse 2       | 22.0                      |
| Control, Mouse 3       | 28.0                      |
| 5-FU, Mouse 1          | 6.0                       |
| 5-FU, Mouse 2          | 5.0                       |
| 5-FU, Mouse 3          | 4.0                       |
| Losartan, Mouse 1      | 4                         |
| Losartan, Mouse 2      | 2                         |
| Losartan, Mouse 3      | 1                         |
| Losartan, Mouse 4      | 3                         |
| Losartan+5-FU, Mouse 1 | 0                         |
| Losartan+5-FU, Mouse 2 | 1                         |

5-FU, Fluorouracil; Conc, concentration; g, gram of tissue; Four experimental groups comprised: a group untreated with either 5-FU or losartan; a 5-FU group that received 5 mg/kg/every other day, administered intraperitoneally (ip); a losartan group received 90 mg/kg/day; ip; a combination group that received 5-FU (5 mg/kg/every other day; ip) plus (losartan 90 mg/kg/day; ip). [Raw data to Figure 2, main document]

**Supplementary Table 3:** Percent of metastatic area and Number of metastatic nodule in treatment groups

| Group                  | Percent of metastatic area | Number of metastatic nodule |
|------------------------|----------------------------|-----------------------------|
| Control, Mouse 1       | 1.159047005795235          | 23.0                        |
| Control, Mouse 2       | 1.1713933415536375         | 22.0                        |
| Control, Mouse 3       | 1.041028781383956          | 21.0                        |
| Control, Mouse 4       | 0.7832898172323759         |                             |
| Control, Mouse 5       | 0.9912767644726409         |                             |
| 5-FU, Mouse 1          | 0.7501442585112522         | 9.0                         |
| 5-FU, Mouse 2          | 0.8947368421052633         | 8.0                         |
| 5-FU, Mouse 3          | 0.9059233449477353         | 7.0                         |
| Losartan, Mouse 1      | 0.506168933881683          |                             |
| Losartan, Mouse 2      | 0.6846556584776481         |                             |
| Losartan, Mouse 3      | 0.5361930294906168         |                             |
| Losartan, Mouse 4      | 0.4750593824228029         |                             |
| Losartan+5-FU, Mouse 1 | 0.47781569965870313        |                             |
| Losartan+5-FU, Mouse 2 | 0.4594180704441041         |                             |
| Losartan+5-FU, Mouse 3 | 0.5594405594405595         |                             |
| Losartan+5-FU, Mouse 4 | 0.5635787249031349         |                             |

5-FU, Fluorouracil; Conc, concentration; g, gram of tissue; Four experimental groups comprised: a group untreated with either 5-FU or losartan; a 5-FU group that received 5 mg/kg/every other day, administered intraperitoneally (ip); a losartan group received 90 mg/kg/day; ip; a combination group that received 5-FU (5 mg/kg/every other day; ip) plus (losartan 90 mg/kg/day; ip). [Raw data to Figure 3, main document]

**Supplementary Table 4:** Oxidative stress markers

| Group                  | MDA   | Thiol | SOD      | CAT  |
|------------------------|-------|-------|----------|------|
| Control, Mouse 1       | 7.13  | 1.15  | 2.01     | 3.25 |
| Control, Mouse 2       | 7.58  | 1.16  | 1.89     | 3.19 |
| Control, Mouse 3       | 7.94  | 1.27  | 1.62     | 3.71 |
| 5-FU, Mouse 1          | 8.36  | 0.88  | 1.01     | 2.25 |
| 5-FU, Mouse 2          | 9.26  | 0.76  | 1.12     | 2.51 |
| 5-FU, Mouse 3          | 9.22  | 0.74  | 1.08     | 2.35 |
| Losartan, Mouse 1      | 10.38 | 0.61  | 0.29921  | 1.82 |
| Losartan, Mouse 2      | 10.67 | 0.63  | 0.45     | 1.72 |
| Losartan, Mouse 3      | 11.29 | 0.59  | 0.52     | 1.9  |
| Losartan+5-FU, Mouse 1 | 12.03 | 0.41  | 0.41     | 1.15 |
| Losartan+5-FU, Mouse 2 | 12.83 | 0.39  | 0.315696 | 1.21 |
| Losartan+5-FU, Mouse 3 | 13    | 0.52  | 0.145053 | 1.19 |

Malon dialdehyde: MDA; Superoxide dismutase activity: SOD; Catalase activity: CAT; Total thiol group: Thio; 5-FU, Fluorouracil; Conc, concentration; g, gram of tissue; Four experimental groups comprised: a group untreated with either 5-FU or losartan; a 5-FU group that received 5 mg/kg/every other day, administered intraperitoneally (ip); a losartan group received 90 mg/kg/day; ip; a combination group that received 5-FU (5 mg/kg/every other day; ip) plus (losartan 90 mg/kg/day; ip). [(Raw data to Figure 4, main document)]

**Supplementary Table 5: IL-6 levels in treatment groups**

| Group                  | OD             | Conc. pg/mL   | g tissue | Conc. pg/g tissue |
|------------------------|----------------|---------------|----------|-------------------|
| Control, Mouse 1       | 0.68           | 114.40        | 0.04     | 2790.24           |
| Control, Mouse 2       | 0.553          | 93.57         | 0.04     | 2599.22           |
| Control, Mouse 3       | 0.545          | 92.26         | 0.03     | 3075.33           |
| Control, Mouse 4       | 0.534          | 90.46         | 0.03     | 3015.20           |
| Average                | <b>0.578</b>   | <b>97.67</b>  |          | <b>2870.00</b>    |
| 5-FU, Mouse 1          | 0.626          | 105.54        | 0.07     | 1507.77           |
| 5-FU, Mouse 2          | 0.571          | 96.52         | 0.04     | 2413.10           |
| 5-FU, Mouse 3          | 0.566          | 95.70         | 0.04     | 2392.60           |
| 5-FU, Mouse 4          | 0.6            | 101.28        | 0.03     | 3376.00           |
| Average                | <b>0.59075</b> | <b>99.76</b>  |          | <b>2422.37</b>    |
| Losartan, Mouse 1      | 0.657          | 110.63        | 0.05     | 2212.56           |
| Losartan, Mouse 2      | 0.558          | 94.39         | 0.08     | 1179.90           |
| Losartan, Mouse 3      | 0.659          | 110.96        | 0.10     | 1109.56           |
| Losartan, Mouse 4      | 0.621          | 104.72        | 0.06     | 1745.40           |
|                        | <b>0.62375</b> | <b>105.18</b> |          | <b>1561.86</b>    |
| Losartan+5-FU, Mouse 1 | 0.682          | 114.73        | 0.10     | 1147.28           |
| Losartan+5-FU, Mouse 2 | 0.549          | 92.92         | 0.10     | 929.16            |
| Losartan+5-FU, Mouse 3 | 0.5            | 84.88         | 0.10     | 848.80            |
| Losartan+5-FU, Mouse 4 | 0.6            | 101.28        | 0.10     | 1012.80           |
| Average                | <b>0.58275</b> | <b>98.45</b>  |          | <b>984.51</b>     |

5-FU, Fluorouracil; Conc, concentration; g, gram of tissue; OD, optical density; IL-6 measurements in lung tissue were performed using Zellbio ELISA kits [Raw data to Figure 5A, main document]

**Supplementary Table 6: VEGF levels in treatment groups**

| Group                  | OD             | Conc. pg/mL | g tissue | Conc. pg/g tissue |
|------------------------|----------------|-------------|----------|-------------------|
| Control, Mouse 1       | 0.379          | 84.42       | 0.04     | 2059.02           |
| Control, Mouse 2       | 0.381          | 84.98       | 0.04     | 2360.51           |
| Control, Mouse 3       | 0.437          | 100.62      | 0.03     | 3354.07           |
| Control, Mouse 4       | 0.346          | 75.20       | 0.03     | 2506.70           |
| Average                | <b>0.38575</b> | 86.31       |          | <b>2570.07</b>    |
| 5-FU, Mouse 1          | 0.464          | 108.16      | 0.07     | 1545.21           |
| 5-FU, Mouse 2          | 0.396          | 89.17       | 0.04     | 2229.22           |
| 5-FU, Mouse 3          | 0.438          | 100.90      | 0.04     | 2522.53           |
| 5-FU, Mouse 4          | 0.391          | 87.77       | 0.03     | 2925.73           |
| Average                | <b>0.42225</b> | 96.50       |          | <b>2305.67</b>    |
| Losartan, Mouse 1      | 0.447          | 103.42      | 0.05     | 2068.31           |
| Losartan, Mouse 2      | 0.469          | 109.56      | 0.08     | 1369.51           |
| Losartan, Mouse 3      | 0.502          | 118.78      | 0.10     | 1187.80           |
| Losartan, Mouse 4      | 0.447          | 103.42      | 0.06     | 1723.59           |
| Average                | <b>0.46625</b> | 108.79      |          | <b>1587.30</b>    |
| Losartan+5-FU, Mouse 1 | 0.372          | 82.46       | 0.10     | 824.64            |
| Losartan+5-FU, Mouse 2 | 0.525          | 125.20      | 0.10     | 1252.05           |
| Losartan+5-FU, Mouse 3 | 0.502          | 118.78      | 0.10     | 1187.80           |
| Losartan+5-FU, Mouse 4 | 0.449          | 103.97      | 0.10     | 1039.74           |
| Average                | <b>0.462</b>   | 107.61      |          | <b>1076.06</b>    |

5-FU, Fluorouracil; Conc, concentration; g, gram of tissue; OD, optical density; Four experimental groups comprised: a group untreated with either 5-FU or losartan; a 5-FU group that received 5 mg/kg/every other day, administered intraperitoneally (ip); a losartan group received 90 mg/kg/day; ip; a combination group that received 5-FU (5 mg/kg/every other day; ip) plus (losartan 90 mg/kg/day; ip). VEGF/VEGFR-1 measurements in lung tissue were performed using Zellbio ELISA kits according to the manufacturer's protocol. [Raw data to Figure 5B, main document]

**Supplementary Table 7: VEGFR level in treatment groups**

| Group                         | OD             | Conc. pg/mL | g tissue | Conc. pg/g tissue |
|-------------------------------|----------------|-------------|----------|-------------------|
| <b>Control, Mouse 1</b>       | 0.469          | 34.47       | 0.04     | 840.7             |
| <b>Control, Mouse 2</b>       | 0.448          | 30.49       | 0.04     | 847.1             |
| <b>Control, Mouse 3</b>       | 0.496          | 39.57       | 0.03     | 1319.1            |
| <b>Control, Mouse 4</b>       | 0.474          | 35.41       | 0.03     | 1180.4            |
| Average                       | <b>0.47175</b> | 34.99       |          | 1046.8            |
| <b>5-FU, Mouse 1</b>          | 0.422          | 25.58       | 0.07     | 365.4             |
| <b>5-FU, Mouse 2</b>          | 0.615          | 62.09       | 0.04     | 1552.1            |
| <b>5-FU, Mouse 3</b>          | 0.48           | 36.55       | 0.04     | 913.7             |
| <b>5-FU, Mouse 4</b>          | 0.475          | 35.60       | 0.03     | 1186.7            |
| Average                       | <b>0.498</b>   | 39.95       |          | 1004.5            |
| <b>Losartan, Mouse 1</b>      | 0.621          | 63.22       | 0.05     | 1264.4            |
| <b>Losartan, Mouse 2</b>      | 0.6            | 59.25       | 0.08     | 740.6             |
| <b>Losartan, Mouse 3</b>      | 0.578          | 55.09       | 0.10     | 550.9             |
| <b>Losartan, Mouse 4</b>      | 0.52           | 44.11       | 0.06     | 735.2             |
| Average                       | <b>0.57975</b> | 55.42       |          | 822.8             |
| <b>Losartan+5-FU, Mouse 1</b> | 0.836          | 103.89      | 0.10     | 1038.9            |
| <b>Losartan+5-FU, Mouse 2</b> | 0.626          | 64.17       | 0.10     | 641.7             |
| <b>Losartan+5-FU, Mouse 3</b> | 0.469          | 34.47       | 0.10     | 344.7             |
| <b>Losartan+5-FU, Mouse 4</b> | 0.472          | 35.03       | 0.10     | 350.3             |
| Average                       | <b>0.60075</b> | 59.39       |          | 593.9             |

5-FU, Fluorouracil; Conc, concentration; g, gram of tissue; OD, optical density; Four experimental groups comprised: a group untreated with either 5-FU or losartan; a 5-FU group that received 5mg/kg/every other day, administered intraperitoneally (ip); a Losartan group received 90 mg/kg/day; ip; a combination group that received 5-FU (5mg/kg/every other day; ip) plus (Losartan 90 mg/kg/day; ip). VEGF / VEGFR-1 measurements in lung tissue were performed using Zellbio ELISA kits according to the manufacturer's protocol. [Raw data to Figure 5C, main document]
